# Supplementary material
Source: publisher figshare collection journal article supplement (https://sage.figshare.com/ndownloader/files/17890235)
Supplement: Supplementary file 1 [file 17890235]

**Supplementary Figure 1 legend:** Animal weights over time of experiment, measured relative to baseline weight.
